# Supplementary material
Source: publisher site journal article supplement (https://www.spandidos-publications.com/353/downloadSupplementary)

Figure S1. Chemokine signaling pathway.

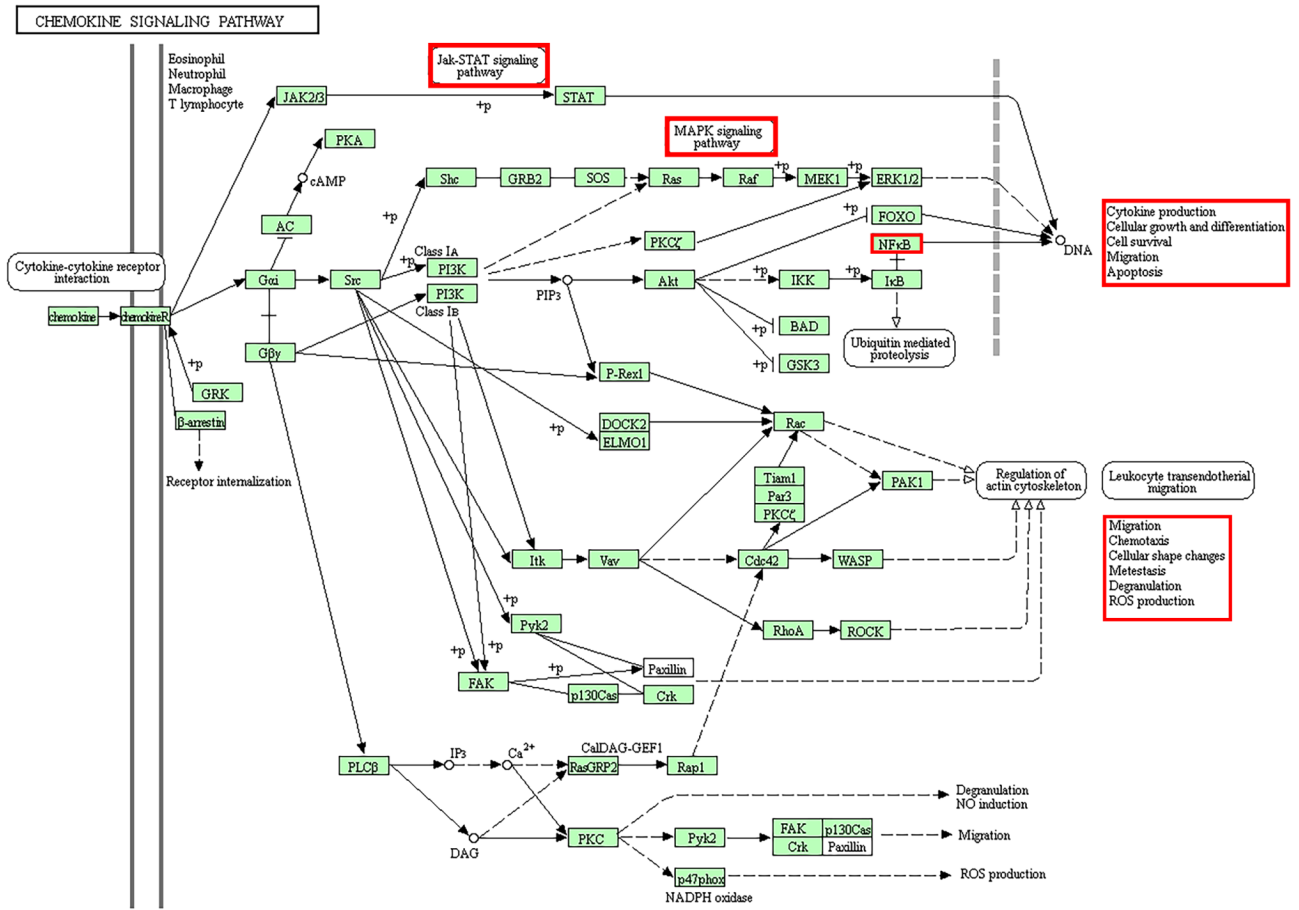

Supplement: Supplementary file 1 [file downloadSupplementary]
